# Supplementary material for: Structural Characterization and Anti-Osteoporosis Effects of a Novel Sialoglycopeptide from Tuna Eggs
Source: MDPI journal article supplement (doi:10.3390/md21110573), 2023-10-31
Supplement: s1 [file s1]

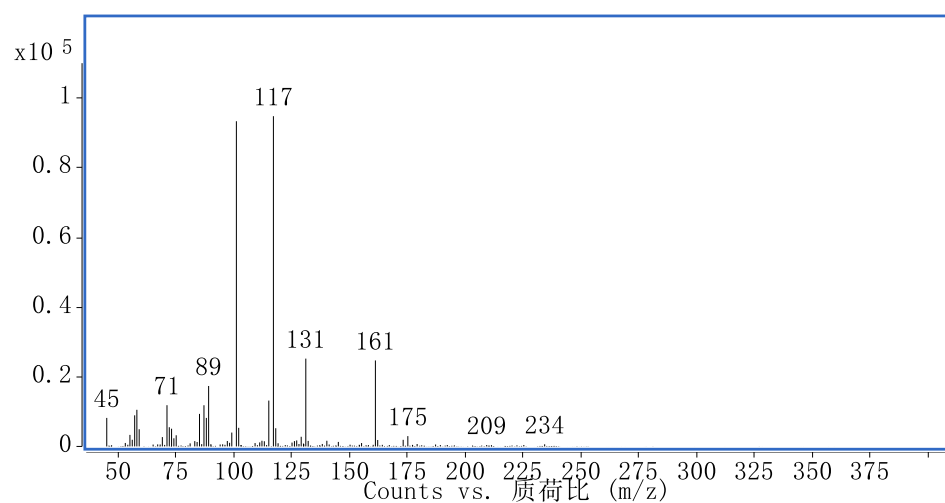

Supplementary Fig. S1 The mass spectra and proposed fragmentation 2,3,4-Me<sub>3</sub>-Fuc

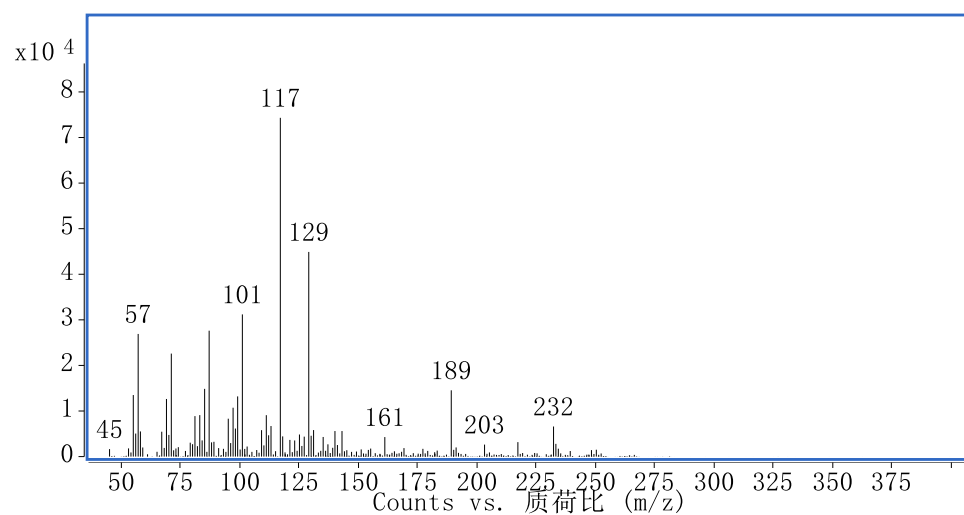

Supplementary Fig. S2 The mass spectra and proposed fragmentation 2,3-Me<sub>2</sub>-Xyl

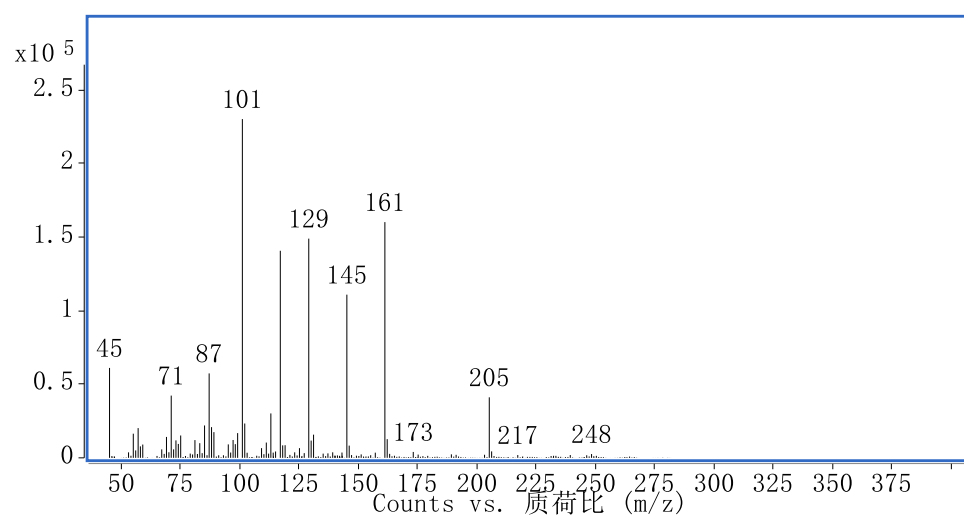

Supplementary Fig. S3 The mass spectra and proposed fragmentation 2,3,4,6-Me<sub>4</sub>-Glc

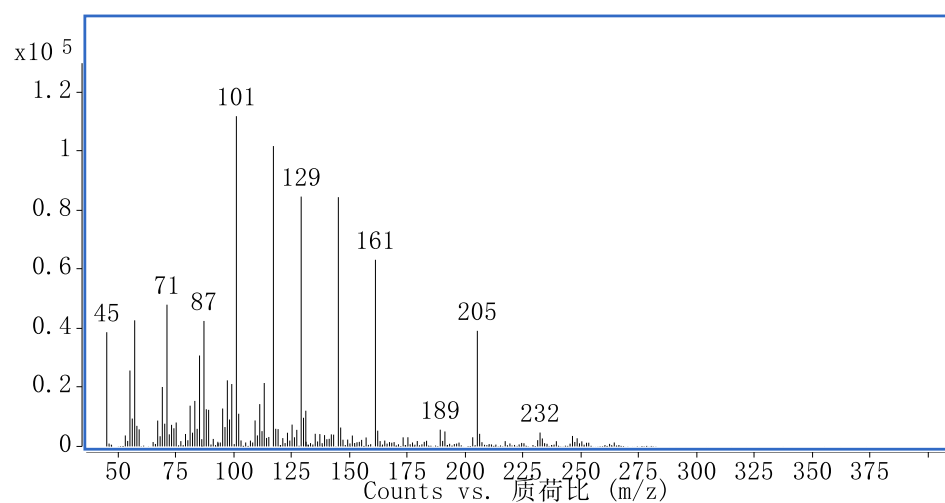

Supplementary Fig. S4 The mass spectra and proposed fragmentation 2,3,4,6-Me<sub>4</sub>-Man

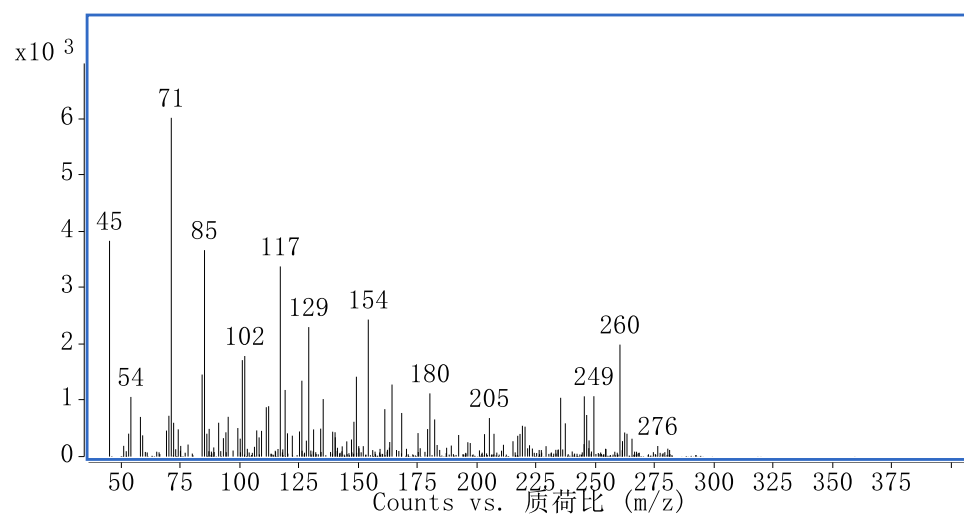

Supplementary Fig. S5 The mass spectra and proposed fragmentation 3,4,6-Me<sub>3</sub>-D-Glc-2-N

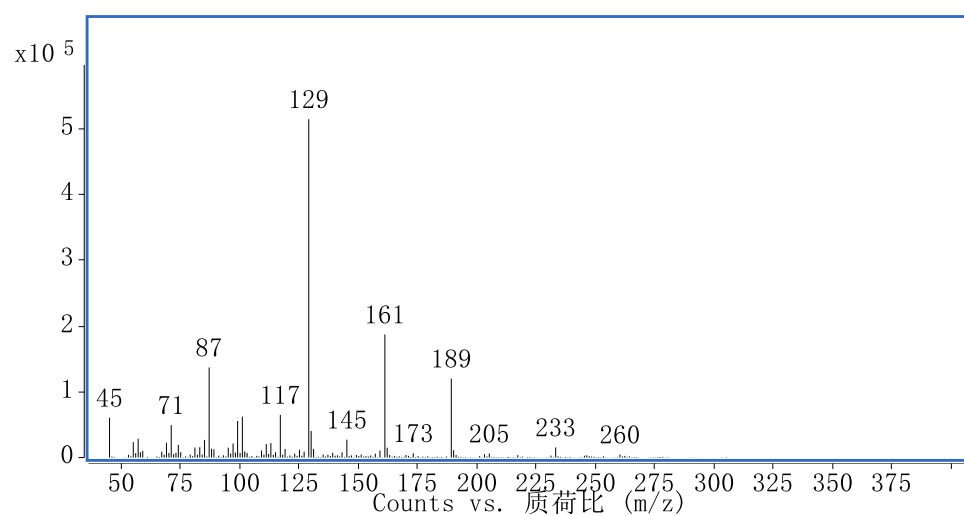

Supplementary Fig. S6 The mass spectra and proposed fragmentation 3,4,6-Me<sub>3</sub>-Man

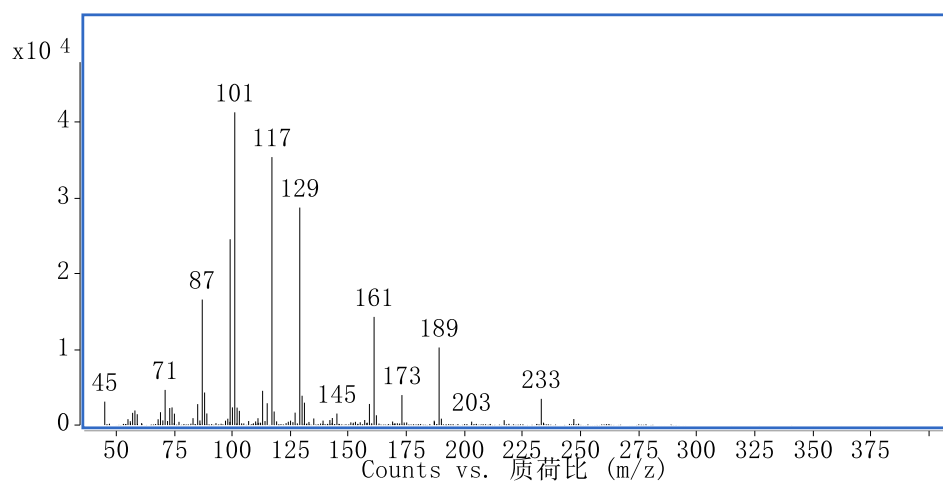

Supplementary Fig. S7 The mass spectra and proposed fragmentation 2,4,6-Me<sub>3</sub>-Glc

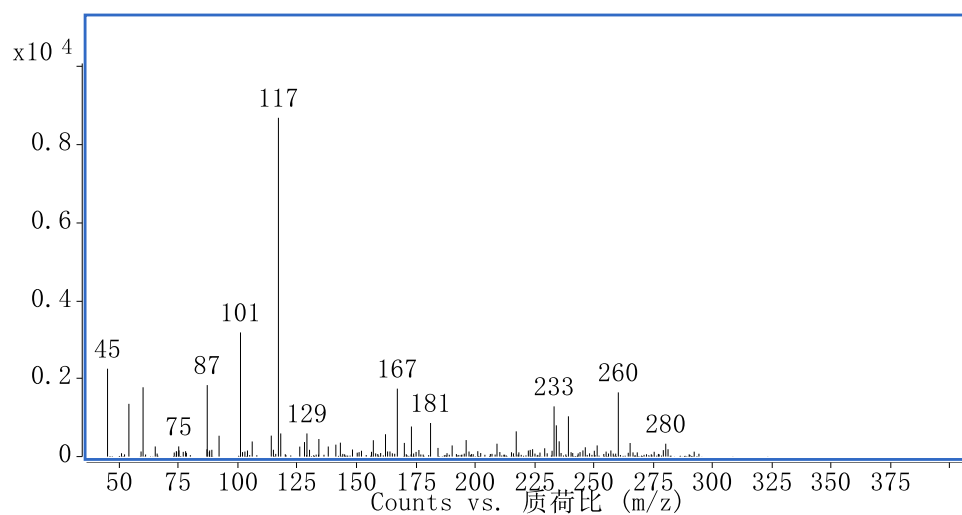

Supplementary Fig. S8 The mass spectra and proposed fragmentation 2,3,6-Me<sub>3</sub>-Glc

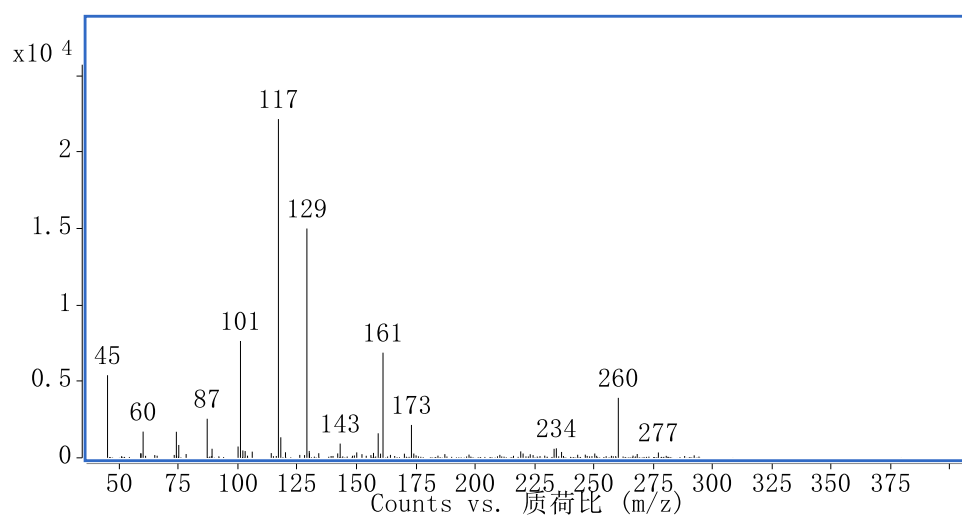

Supplementary Fig. S9 The mass spectra and proposed fragmentation 2,4,6-Me<sub>3</sub>-Gal

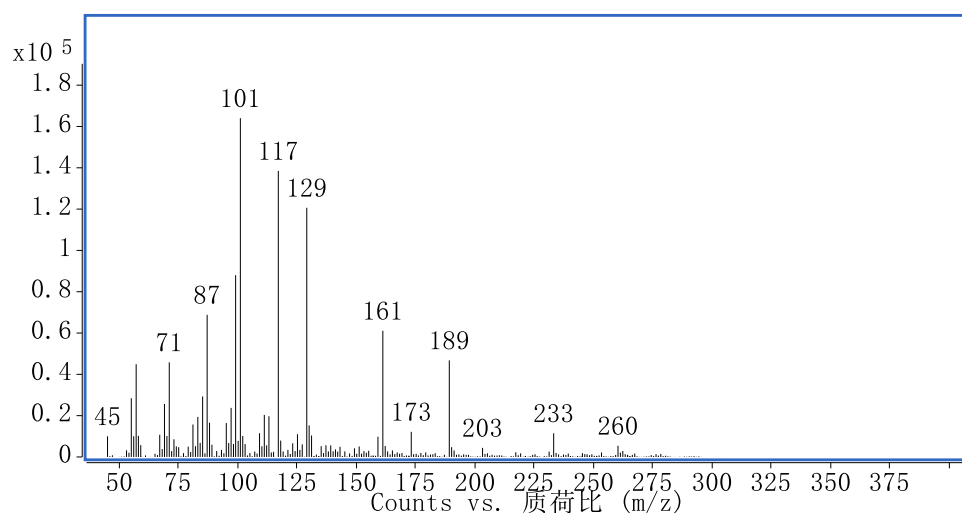

Supplementary Fig. S10 The mass spectra and proposed fragmentation 2,3,4-Me<sub>3</sub>-Glc

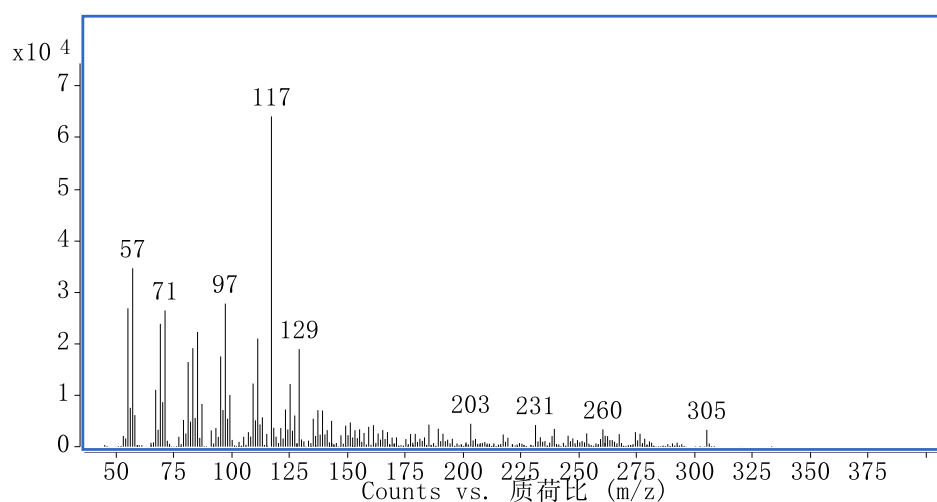

Supplementary Fig. S11 The mass spectra and proposed fragmentation 2,6-Me<sub>2</sub>-Glc

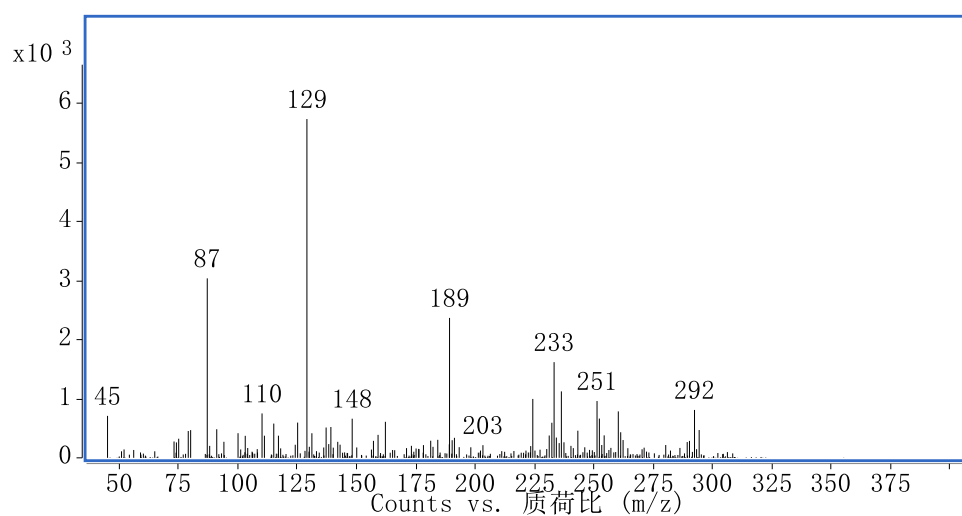

Supplementary Fig. S12 The mass spectra and proposed fragmentation 2,3-Me<sub>2</sub>-Man

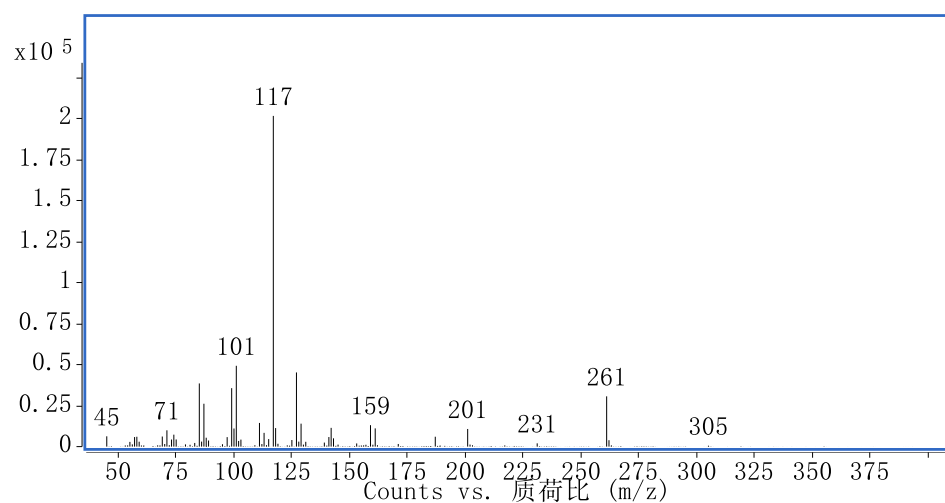

Supplementary Fig. S13 The mass spectra and proposed fragmentation 2,3-Me<sub>2</sub>-Glc

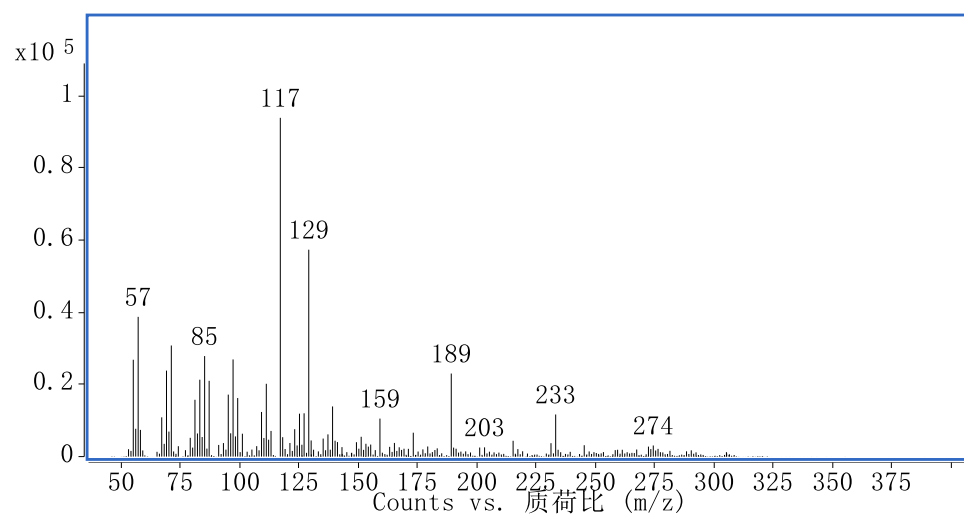

Supplementary Fig. S14 The mass spectra and proposed fragmentation 2,4-Me<sub>2</sub>-Glc

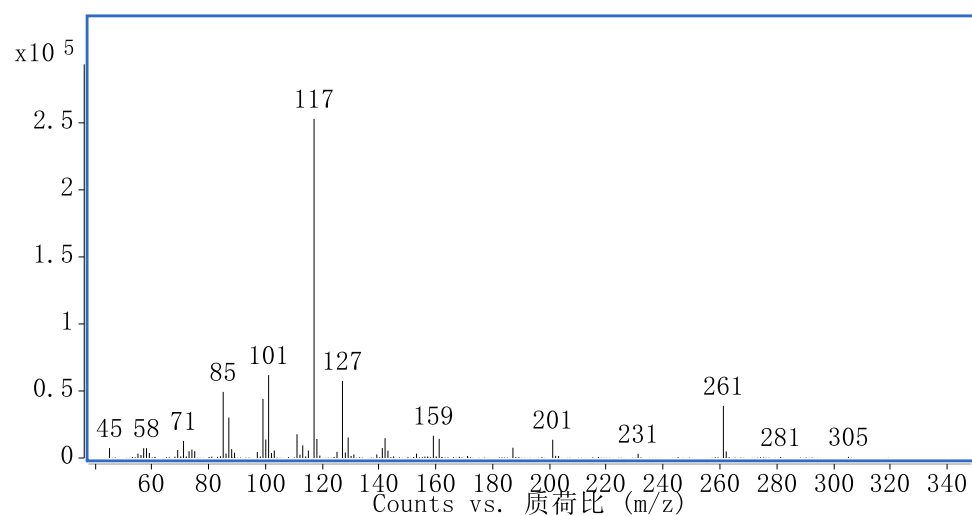

Supplementary Fig. S15 The mass spectra and proposed fragmentation 2,3-Me<sub>2</sub>-Gal

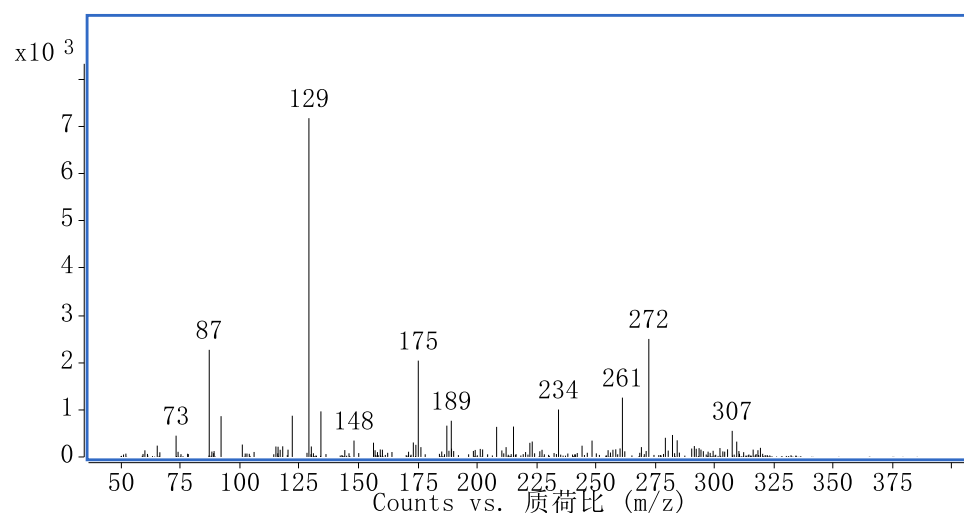

Supplementary Fig. S16 The mass spectra and proposed fragmentation 4,6-Me<sub>2</sub>-D-Gal-2-N

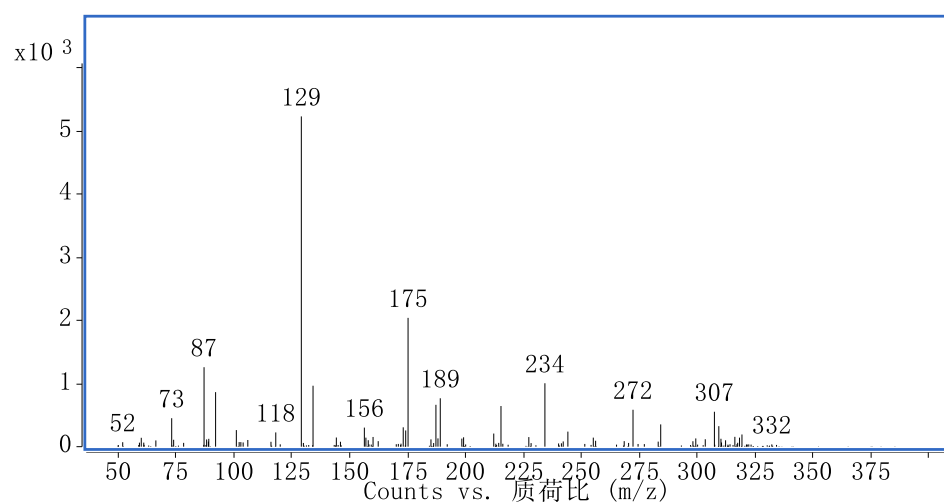

Supplementary Fig. S17 The mass spectra and proposed fragmentation 4,6-Me<sub>2</sub>-D-Glc-2-N

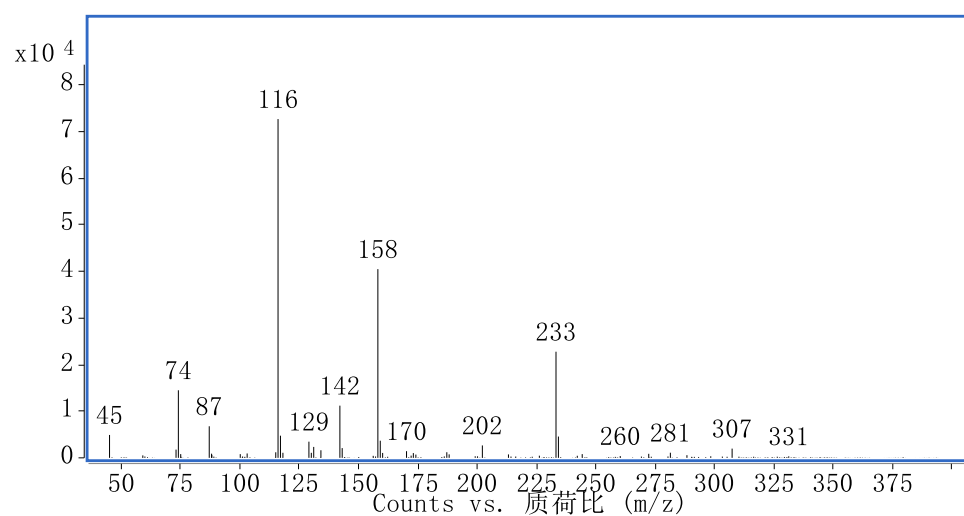

Supplementary Fig. S18 The mass spectra and proposed fragmentation 4-Me<sub>1</sub>-D-Gal-2-N

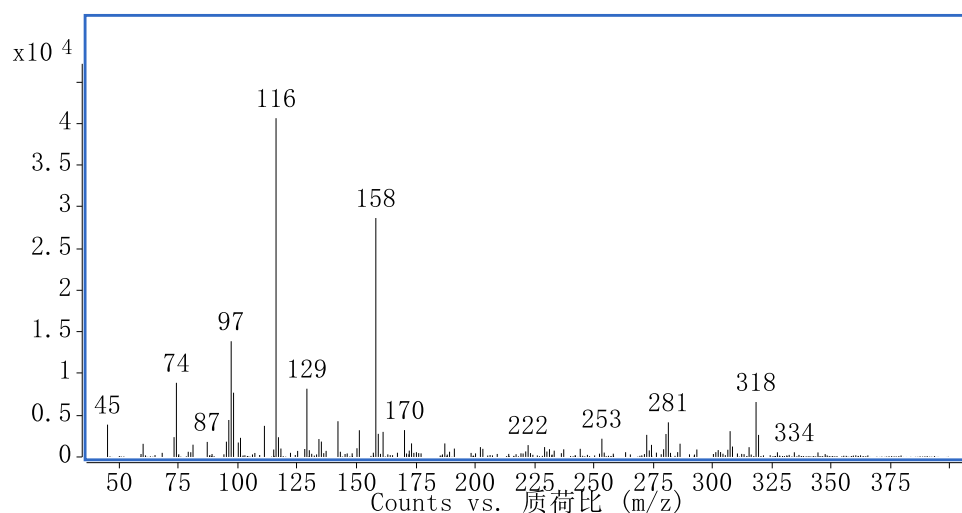

Supplementary Fig. S19 The mass spectra and proposed fragmentation 4-Me<sub>1</sub>-D-Glc-2-N

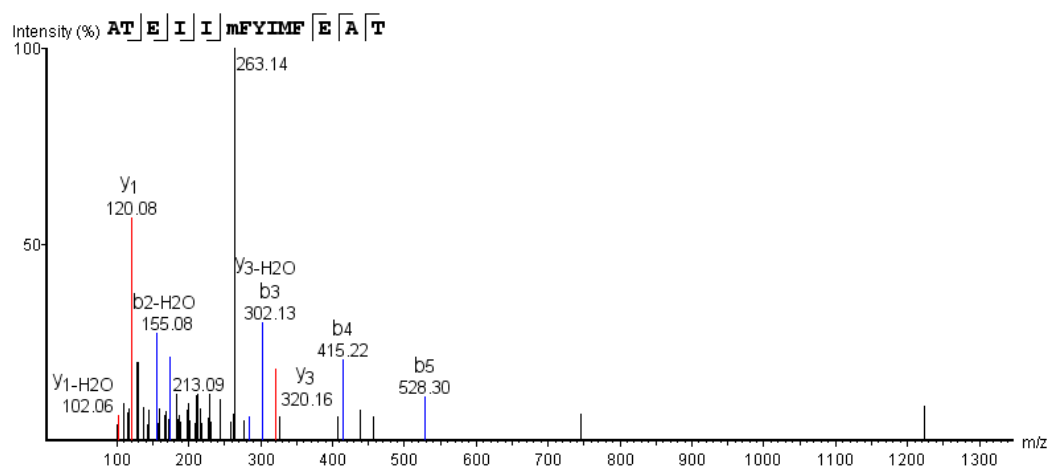

Supplementary Fig. S20 Two-stage mass spectrum of ATEImFYIMFIEAT peptide segment of T-ES

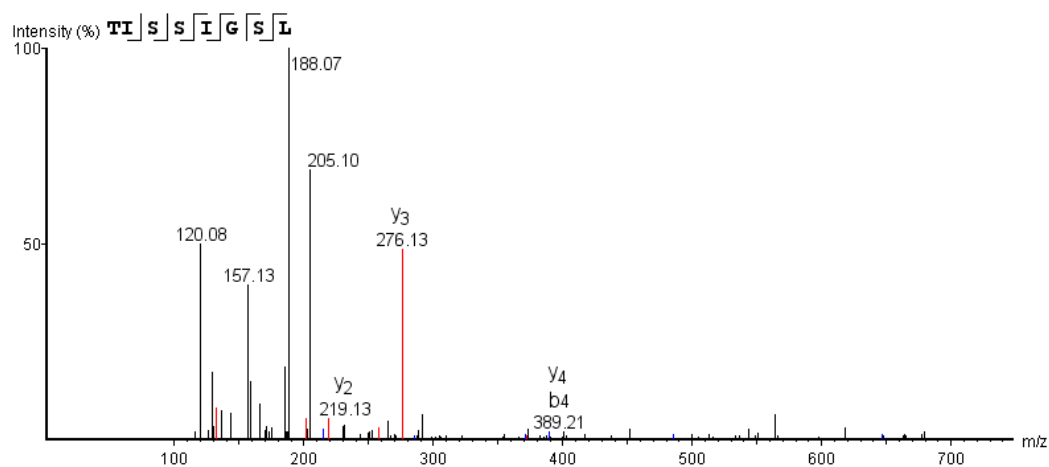

Supplementary Fig. S21 Two-stage mass spectrum of TISSIGSL peptide segment of T-ES

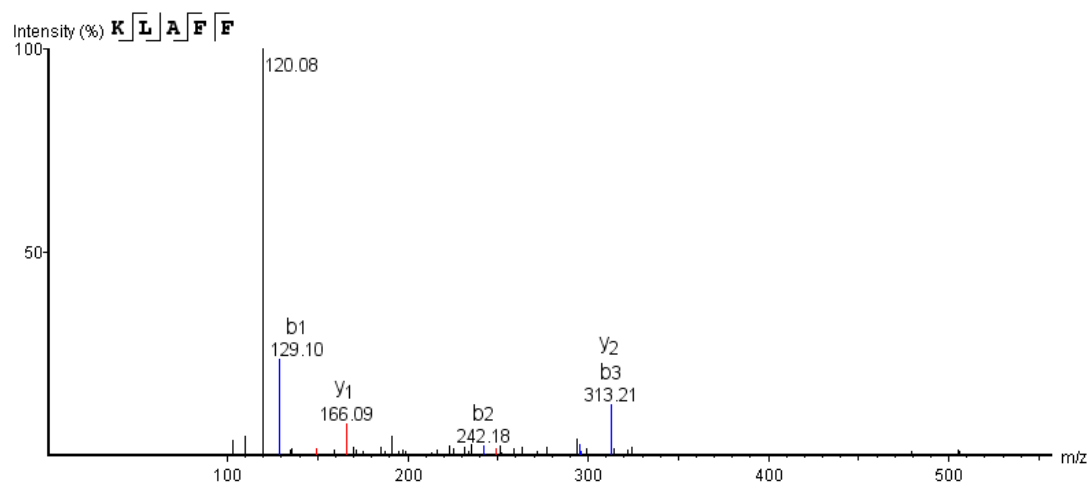

Supplementary Fig. S22 Two-stage mass spectrum of KLAFF peptide segment of T-ES

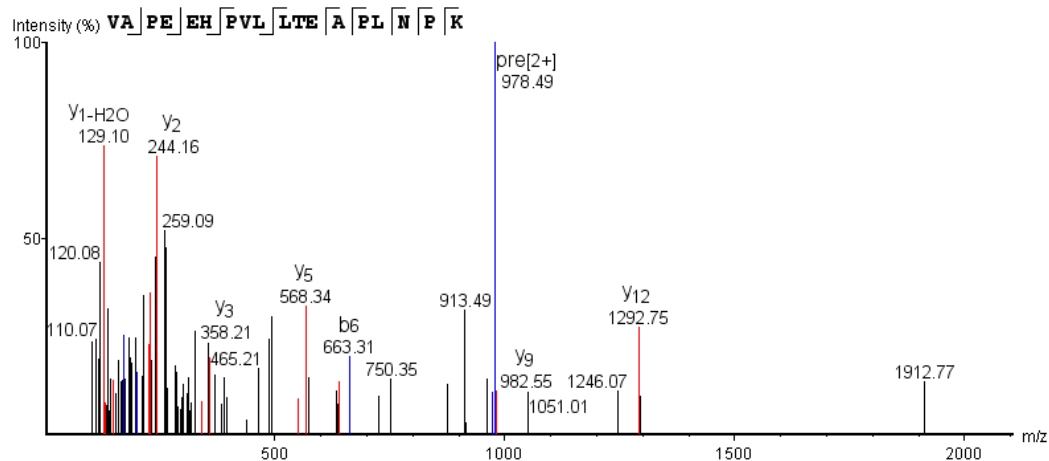

Supplementary Fig. S23 Two-stage mass spectrum of VAPEEHPVLLTEAPLNPK peptide segment of T-ES

Supplementary Table S1 Match peptides segment list information

| No. | Peptide fragment   | Molecular weight | m/z      | Reliability | Area               |
|-----|--------------------|------------------|----------|-------------|--------------------|
| 1   | ATEImFYIMFIEAT     | 789.4272         | 790.4354 | 45.16       | $9.13 \times 10^5$ |
| 2   | TISSIGSL           | 776.4280         | 389.2180 | 35.34       | $3.34 \times 10^5$ |
| 3   | KLAFF              | 624.3635         | 313.1895 | 38.07       | $1.06 \times 10^5$ |
| 4   | ADNKSMI            | 777.3691         | 389.6900 | 18.94       | $2.37 \times 10^7$ |
| 5   | VAPEEHPVLLTEAPLNPK | 1953.0570        | 977.5369 | 36.87       | $7.23 \times 10^4$ |
